# Supplementary material for: Crucial role for Nox2 and sleep deprivation in aircraft noise-induced vascular and cerebral oxidative stress, inflammation, and gene regulation
Source: PubMed Central journal article supplement — Eur Heart J. 2018 Jun 14;39(38):3528–39. doi: 10.1093/eurheartj/ehy333 (PMC6174027; doi:10.1093/eurheartj/ehy333), 2018-06-14
Supplement: ehy333_suppl_tables.pdf [file ehy333_suppl_tables.pdf]

**Table S1.** Significantly regulated genes of GO-Term GO:0007623 - circadian rhythm in aorta, heart and kidney after noise exposure (24h, 4d)

|                 |                                                              | Aorta - Control vs.<br>4 days noise |                     | Heart - Control vs.<br>4 days noise |                     | Kidney - Control vs.<br>4 days noise |                     |
|-----------------|--------------------------------------------------------------|-------------------------------------|---------------------|-------------------------------------|---------------------|--------------------------------------|---------------------|
|                 |                                                              | lfcMLE                              | p-value<br>adjusted | lfcMLE                              | p-value<br>adjusted | lfcMLE                               | p-value<br>adjusted |
| <i>Arntl</i>    | aryl hydrocarbon receptor nuclear translocator-like          | 1.17                                | 0.00051775          | 0.27                                | 0.7165055           | 1.21                                 | 3.88E-26            |
| <i>Cry1</i>     | cryptochrome 1 (photolyase-like)                             | 1.07                                | 4.55E-07            | 0.57                                | 0.05123406          | 1.15                                 | 9.56E-07            |
| <i>Npas2</i>    | neuronal PAS domain protein 2                                | 0.95                                | 0.00552347          | -0.41                               | 0.77480653          | 1.23                                 | 4.88E-10            |
| <i>Id2</i>      | inhibitor of DNA binding 2                                   | 0.63                                | 4.71E-06            | 0.02                                | 0.99075922          | 0.48                                 | 0.00011816          |
| <i>Gpr157</i>   | G protein-coupled receptor 157                               | 0.43                                | 0.01322795          | 0.28                                | 0.75992755          | -0.04                                | 0.98461102          |
| <i>Star</i>     | steroidogenic acute regulatory protein                       | 0.43                                | 0.02949489          | -0.17                               | 0.9185866           | -0.09                                | 0.95074376          |
| <i>Id4</i>      | inhibitor of DNA binding 4                                   | 0.40                                | 0.01957704          | -1.16                               | 0.70725432          | 0.31                                 | 0.80641999          |
| <i>Pml</i>      | promyelocytic leukemia                                       | 0.28                                | 0.00475916          | -0.08                               | 0.94785857          | 0.04                                 | 0.95580073          |
| <i>Cul3</i>     | cullin 3                                                     | -0.18                               | 0.03288531          | 0.08                                | 0.93137358          | 0.00                                 | 0.99769682          |
| <i>Rps27a</i>   | ribosomal protein S27A                                       | -0.20                               | 0.03754223          | 0.30                                | 0.71057801          | -0.05                                | 0.9262183           |
| <i>Fmr1</i>     | fragile X mental retardation syndrome 1                      | -0.23                               | 0.02895276          | -0.45                               | 0.29900206          | 0.01                                 | 0.98687891          |
| <i>Syncrin1</i> | synaptotagmin binding, cytoplasmic RNA interacting protein   | -0.23                               | 0.00479011          | -0.16                               | 0.82055999          | 0.04                                 | 0.94841419          |
| <i>Atf5</i>     | activating transcription factor 5                            | -0.28                               | 0.04361746          | -0.01                               | 0.99234566          | -0.20                                | 0.78340179          |
| <i>Relb</i>     | avian reticuloendotheliosis viral (v-rel) oncogene related B | -0.28                               | 0.03322863          | -0.30                               | 0.77138484          | -0.22                                | 0.77503961          |
| <i>Nampt</i>    | nicotinamide phosphoribosyltransferase                       | -0.37                               | 0.00040244          | 0.17                                | 0.84923089          | -0.09                                | 0.86306256          |
| <i>Rora</i>     | RAR-related orphan receptor alpha                            | -0.37                               | 0.00778862          | -0.28                               | 0.70873644          | 0.00                                 | 0.99758185          |
| <i>Creml</i>    | cAMP responsive element modulator                            | -0.38                               | 0.01878781          | 0.00                                | 0.99863022          | -0.03                                | 0.96555616          |
| <i>Fosl2</i>    | fos-like antigen 2                                           | -0.39                               | 0.00404168          | -0.89                               | 2.03E-11            | -0.31                                | 0.66164095          |
| <i>Cst3</i>     | cystatin C                                                   | -0.40                               | 0.0070909           | 0.27                                | 0.78206151          | -0.26                                | 0.14392794          |
| <i>Kdm5a</i>    | lysine (K)-specific demethylase 5A                           | -0.46                               | 2.69E-05            | -0.12                               | 0.9099024           | -0.04                                | 0.96064493          |
| <i>Usp2</i>     | ubiquitin specific peptidase 2                               | -0.54                               | 0.00223347          | -0.23                               | 0.72796156          | -0.62                                | 4.66E-05            |
| <i>Bhlhe40</i>  | basic helix-loop-helix family, member e40                    | -0.67                               | 0.00025125          | -0.36                               | 0.32837258          | 0.03                                 | 0.98003573          |
| <i>Id1</i>      | inhibitor of DNA binding 1                                   | -0.67                               | 0.00016262          | 0.32                                | 0.83909762          | 0.14                                 | 0.90950898          |
| <i>Bdnf</i>     | brain derived neurotrophic factor                            | -0.72                               | 2.25E-05            | -0.08                               | 0.94137351          | -0.44                                | 0.43114066          |

|                 |                                                             |       |            |       |            |       |            |
|-----------------|-------------------------------------------------------------|-------|------------|-------|------------|-------|------------|
| <i>Klf9</i>     | Kruppel-like factor 9                                       | -0.92 | 5.36E-11   | -0.65 | 0.24028767 | -0.48 | 0.1138832  |
| <i>Jund</i>     | jun D proto-oncogene                                        | -1.06 | 3.59E-17   | 0.15  | 0.92249934 | -0.63 | 0.06840794 |
| <i>Serpine1</i> | serine (or cysteine) peptidase inhibitor, clade E, member 1 | -1.16 | 8.70E-16   | -1.07 | 0.22067185 | -0.95 | 0.13324704 |
| <i>Homer1</i>   | homer scaffolding protein 1                                 | -1.30 | 2.44E-14   | 0.04  | 0.97837598 | -0.05 | 0.95074376 |
| <i>Nr1d2</i>    | nuclear receptor subfamily 1, group D, member 2             | -1.48 | 1.88E-05   | -0.81 | 0.00146314 | -0.88 | 7.47E-15   |
| <i>Nrip1</i>    | nuclear receptor interacting protein 1                      | -1.61 | 0.00014643 | -0.30 | 0.83471026 | 0.16  | 0.86326892 |
| <i>Ciart</i>    | circadian associated repressor of transcription             | -1.74 | 2.71E-05   | -0.22 | 0.91823531 | -1.13 | 0.24569152 |
| <i>Per1</i>     | period circadian clock 1                                    | -1.88 | 2.11E-31   | -2.35 | 3.67E-13   | -1.64 | 7.10E-09   |
| <i>Dbp</i>      | D site albumin promoter binding protein                     | -2.05 | 0.01964087 | -1.21 | 0.03693016 | -3.16 | 1.89E-54   |

**Table S2.** Significantly regulated genes of GO-Term GO:0006954 - inflammatory response in aorta, heart and kidney after noise exposure (24h, 4d)

|                |                                                                       | Aorta - Control vs.<br>4 days noise |                     | Heart - Control vs.<br>4 days noise |                     | Kidney - Control vs.<br>4 days noise |                     |
|----------------|-----------------------------------------------------------------------|-------------------------------------|---------------------|-------------------------------------|---------------------|--------------------------------------|---------------------|
|                |                                                                       | lfcMLE                              | p-value<br>adjusted | lfcMLE                              | p-value<br>adjusted | lfcMLE                               | p-value<br>adjusted |
| <i>C3ar1</i>   | complement component 3a receptor 1                                    | -0.54                               | 0.00244504          | -0.34                               | 0.69591567          | -0.54                                | 0.55513965          |
| <i>Hdac7</i>   | histone deacetylase 7                                                 | -0.35                               | 2.62E-07            | -0.08                               | 0.95168013          | -0.16                                | 0.8124949           |
| <i>Ndst1</i>   | N-deacetylase/N-sulfotransferase (heparan glucosaminyl) 1             | -0.35                               | 0.00311131          | 0.27                                | 0.80192733          | 0.01                                 | 0.99487113          |
| <i>F3</i>      | coagulation factor III                                                | -0.33                               | 0.00436241          | 0.17                                | 0.7459955           | 0.27                                 | 0.45869495          |
| <i>Irak2</i>   | interleukin-1 receptor-associated kinase 2                            | -0.27                               | 0.02547748          | 0.42                                | 0.53209847          | -0.06                                | 0.84595892          |
| <i>Pxk</i>     | PX domain containing serine/threonine kinase                          | -0.26                               | 0.02938509          | 0.00                                | 0.99732028          | -0.02                                | 0.96992394          |
| <i>Ikkkb</i>   | inhibitor of kappaB kinase beta                                       | -0.25                               | 0.02216162          | -0.50                               | 0.82437578          | -0.04                                | 0.9258147           |
| <i>Acvr1</i>   | activin A receptor, type 1                                            | -0.25                               | 0.00765311          | 0.13                                | 0.87038             | -0.10                                | 0.91279746          |
| <i>Lipa</i>    | lysosomal acid lipase A                                               | -0.24                               | 0.00523168          | 0.00                                | 0.99907399          | -0.07                                | 0.8694437           |
| <i>Adam17</i>  | a disintegrin and metallopeptidase domain 17                          | -0.23                               | 0.04032625          | -0.09                               | 0.90829868          | -0.15                                | 0.48878624          |
| <i>Nfe2l2</i>  | nuclear factor, erythroid derived 2, like 2                           | 0.21                                | 0.01021042          | 0.13                                | 0.82055999          | -0.04                                | 0.93874223          |
| <i>Hspg2</i>   | perlecan (heparan sulfate proteoglycan 2)                             | 0.23                                | 0.01055687          | 0.36                                | 0.67646491          | 0.00                                 | 0.99697525          |
| <i>Itgav</i>   | integrin alpha V                                                      | 0.23                                | 0.01166671          | 0.37                                | 0.64646563          | 0.01                                 | 0.98350481          |
| <i>Rela</i>    | v-rel reticuloendotheliosis viral oncogene homolog A (avian)          | 0.24                                | 0.03082669          | 0.04                                | 0.96617622          | 0.02                                 | 0.97667438          |
| <i>Cx3cl1</i>  | chemokine (C-X3-C motif) ligand 1                                     | 0.25                                | 0.03766403          | -0.18                               | 0.78046423          | 0.00                                 | 0.99706639          |
| <i>Relb</i>    | avian reticuloendotheliosis viral (v-rel) oncogene related B          | 0.28                                | 0.03322863          | 0.30                                | 0.77138484          | 0.22                                 | 0.77503961          |
| <i>Tgfb1</i>   | transforming growth factor, beta 1                                    | 0.31                                | 0.04075918          | -0.19                               | 0.87065632          | 0.18                                 | 0.84162201          |
| <i>Hnrnpa0</i> | heterogeneous nuclear ribonucleoprotein A0                            | 0.32                                | 0.00219793          | 0.05                                | 0.93452168          | 0.10                                 | 0.75568908          |
| <i>Vcam1</i>   | vascular cell adhesion molecule 1                                     | 0.32                                | 0.00888199          | 0.12                                | 0.89476221          | -0.30                                | 0.43167785          |
| <i>Pik3cb</i>  | phosphatidylinositol-4,5-bisphosphate 3-kinase catalytic subunit beta | 0.33                                | 0.0171626           | 0.09                                | 0.89229305          | -0.03                                | 0.96555616          |
| <i>Notch1</i>  | notch 1                                                               | 0.41                                | 0.02547748          | 0.20                                | 0.71057801          | -0.12                                | 0.76769295          |
| <i>Cd24a</i>   | CD24a antigen                                                         | 0.43                                | 0.00239099          | 0.33                                | 0.86188081          | 0.32                                 | 0.22863477          |
| <i>Ncf1</i>    | neutrophil cytosolic factor 1                                         | 0.43                                | 0.0457203           | 0.44                                | 0.62344647          | -0.09                                | 0.96383221          |

|                 |                                                                          |      |            |       |            |       |            |
|-----------------|--------------------------------------------------------------------------|------|------------|-------|------------|-------|------------|
| <i>Casp4</i>    | caspase 4, apoptosis-related cysteine peptidase                          | 0.45 | 0.02126494 | 0.55  | 0.67646491 | 0.39  | 0.77579689 |
| <i>Gja1</i>     | gap junction protein, alpha 1                                            | 0.51 | 6.91E-12   | -0.24 | 0.72643569 | 0.44  | 0.71084764 |
| <i>Ly75</i>     | lymphocyte antigen 75                                                    | 0.55 | 0.01237619 | 0.34  | 0.89922218 | -0.06 | 0.97258762 |
| <i>Bmp2</i>     | bone morphogenetic protein 2                                             | 0.60 | 0.0009537  | 0.39  | 0.84855361 | -0.11 | 0.95569157 |
| <i>Ccl9</i>     | chemokine (C-C motif) ligand 9                                           | 0.61 | 2.20E-05   | 0.45  | 0.2936026  | 0.40  | 0.75024266 |
| <i>Pparg</i>    | peroxisome proliferator activated receptor gamma                         | 0.62 | 0.01866393 | -0.16 | 0.88294743 | 1.16  | 0.6881325  |
| <i>Mif</i>      | macrophage migration inhibitory factor (glycosylation-inhibiting factor) | 0.66 | 0.00012477 | -0.34 | 0.76689156 | 0.29  | 0.55400949 |
| <i>Tlr4</i>     | toll-like receptor 4                                                     | 0.75 | 2.96E-11   | 0.34  | 0.78279682 | -0.12 | 0.95798562 |
| <i>F8</i>       | coagulation factor VIII                                                  | 0.78 | 0.01898663 | -0.17 | 0.9099024  | -0.11 | 0.8652184  |
| <i>Crlf2</i>    | cytokine receptor-like factor 2                                          | 0.83 | 0.00039539 | -0.21 | 0.90933366 | 0.53  | 0.64853411 |
| <i>Tnfrsf21</i> | tumor necrosis factor receptor superfamily, member 21                    | 1.02 | 1.14E-05   | 0.31  | 0.62560295 | 0.38  | 0.07198322 |
| <i>Cebpb</i>    | CCAAT/enhancer binding protein (C/EBP), beta                             | 1.22 | 1.72E-07   | 0.74  | 0.53974004 | 0.47  | 0.31674745 |
| <i>Ptgs2</i>    | prostaglandin-endoperoxide synthase 2                                    | 1.26 | 0.00042112 | 0.86  | 0.70870442 | 0.90  | 0.66135485 |
| <i>Cxcr4</i>    | chemokine (C-X-C motif) receptor 4                                       | 1.33 | 0.00352778 | -0.32 | 0.71380357 | 0.86  | 0.08558721 |
| <i>Rel</i>      | reticuloendotheliosis oncogene                                           | 1.34 | 0.02949489 | -0.30 | 0.8472655  | 0.25  | 0.91283844 |

**Table S3.** Significantly regulated genes of GO-Term GO:0006979 – response to oxidative stress in aorta, heart and kidney after noise exposure (24h, 4d)

|                |                                                                                              | Aorta - Control vs.<br>4 days noise |                     | Heart - Control vs.<br>4 days noise |                     | Kidney - Control vs.<br>4 days noise |                     |
|----------------|----------------------------------------------------------------------------------------------|-------------------------------------|---------------------|-------------------------------------|---------------------|--------------------------------------|---------------------|
|                |                                                                                              | lfcMLE                              | p-value<br>adjusted | lfcMLE                              | p-value<br>adjusted | lfcMLE                               | p-value<br>adjusted |
| <i>Arntl</i>   | aryl hydrocarbon receptor nuclear translocator-like                                          | -1.17                               | 0.00051775          | -0.27                               | 0.716505504         | -1.21                                | 3.88E-26            |
| <i>Angptl7</i> | angiopoietin-like 7                                                                          | -0.88                               | 0.021259882         | 0.24                                | 0.938467271         | 0.33                                 | 0.625952489         |
| <i>Prkcd</i>   | protein kinase C, delta                                                                      | -0.53                               | 2.13E-11            | 0.36                                | 0.69514249          | -0.07                                | 0.807802929         |
| <i>Pdgfrb</i>  | platelet derived growth factor receptor, beta polypeptide                                    | -0.49                               | 1.95E-10            | 0.13                                | 0.892293047         | -0.40                                | 0.222857547         |
| <i>Star</i>    | steroidogenic acute regulatory protein                                                       | -0.43                               | 0.029494889         | 0.17                                | 0.918586601         | 0.09                                 | 0.950743755         |
| <i>Casp3</i>   | caspase 3                                                                                    | -0.36                               | 0.045087321         | -0.01                               | 0.996403845         | 0.01                                 | 0.993058405         |
| <i>Stx2</i>    | syntaxin 2                                                                                   | -0.35                               | 0.000120277         | -0.22                               | 0.777695683         | -0.07                                | 0.930587747         |
| <i>Mill2</i>   | MHC I like leukocyte 2                                                                       | -0.35                               | 0.015030034         | 0.25                                | 0.771384844         | 0.09                                 | 0.964400387         |
| <i>Oxsr1</i>   | oxidative-stress responsive 1                                                                | -0.33                               | 8.44E-05            | -0.12                               | 0.852094584         | -0.09                                | 0.737918773         |
| <i>Ankzf1</i>  | ankyrin repeat and zinc finger domain containing 1                                           | -0.28                               | 0.036909163         | 0.14                                | 0.854336317         | -0.04                                | 0.960644925         |
| <i>Pml</i>     | promyelocytic leukemia                                                                       | -0.28                               | 0.004759161         | 0.08                                | 0.947858568         | -0.04                                | 0.95580073          |
| <i>Hdac6</i>   | histone deacetylase 6                                                                        | -0.28                               | 0.007319698         | 0.04                                | 0.949773275         | 0.00                                 | 0.997696824         |
| <i>Map3k5</i>  | mitogen-activated protein kinase kinase kinase 5                                             | -0.28                               | 0.000884186         | -0.15                               | 0.860693423         | -0.12                                | 0.705611583         |
| <i>Mapk9</i>   | mitogen-activated protein kinase 9                                                           | -0.26                               | 0.001213555         | 0.00                                | 0.999073992         | -0.10                                | 0.629348975         |
| <i>Parp1</i>   | poly (ADP-ribose) polymerase family, member 1                                                | -0.26                               | 0.000657141         | -0.10                               | 0.894205931         | -0.05                                | 0.89855727          |
| <i>Dapk1</i>   | death associated protein kinase 1                                                            | -0.24                               | 0.031419954         | 0.03                                | 0.973013544         | -0.17                                | 0.625952489         |
| <i>Stat6</i>   | signal transducer and activator of transcription 6                                           | -0.21                               | 0.000947663         | -0.05                               | 0.92644222          | -0.12                                | 0.488786236         |
| <i>Rcan2</i>   | regulator of calcineurin 2                                                                   | -0.19                               | 0.041894116         | -0.05                               | 0.949422771         | 0.05                                 | 0.955200308         |
| <i>Nfe2l2</i>  | nuclear factor, erythroid derived 2, like 2                                                  | 0.21                                | 0.010210421         | 0.13                                | 0.820559992         | -0.04                                | 0.938742233         |
| <i>Plekha1</i> | pleckstrin homology domain containing, family A (phosphoinositide binding specific) member 1 | 0.21                                | 0.032811914         | 0.22                                | 0.707254315         | -0.01                                | 0.975060884         |
| <i>Hspd1</i>   | heat shock protein 1 (chaperonin)                                                            | 0.23                                | 0.042217971         | -0.04                               | 0.974670043         | 0.03                                 | 0.947546219         |
| <i>Itgav</i>   | integrin alpha V                                                                             | 0.23                                | 0.011666714         | 0.37                                | 0.646465633         | 0.01                                 | 0.983504806         |
| <i>Rela</i>    | v-rel reticuloendotheliosis viral oncogene homolog A (avian)                                 | 0.24                                | 0.030826693         | 0.04                                | 0.966176224         | 0.02                                 | 0.976674384         |

|                  |                                                               |      |             |       |             |       |             |
|------------------|---------------------------------------------------------------|------|-------------|-------|-------------|-------|-------------|
| <i>Ndufb4</i>    | NADH dehydrogenase (ubiquinone) 1 beta subcomplex 4           | 0.26 | 0.036756091 | -0.30 | 0.701355486 | 0.27  | 0.076108243 |
| <i>Cytc</i>      | cytochrome c, somatic                                         | 0.27 | 0.041840317 | -0.12 | 0.871695243 | 0.17  | 0.488786236 |
| <i>Apex1</i>     | apurinic/apurimidine endonuclease 1                           | 0.30 | 0.043709969 | -0.18 | 0.880994485 | 0.01  | 0.989363236 |
| <i>Ndufa6</i>    | NADH dehydrogenase (ubiquinone) 1 alpha subcomplex, 6 (B14)   | 0.30 | 0.024297325 | -0.35 | 0.727421849 | 0.35  | 0.039700131 |
| <i>Cpeb2</i>     | cytoplasmic polyadenylation element binding protein 2         | 0.30 | 0.047688532 | 0.14  | 0.920128864 | -0.18 | 0.639976901 |
| <i>Bnip3</i>     | BCL2/adenovirus E1B interacting protein 3                     | 0.31 | 0.001581338 | -0.17 | 0.836560605 | 0.21  | 0.010640264 |
| <i>ApoE</i>      | apolipoprotein E                                              | 0.32 | 0.015527214 | 0.13  | 0.938807115 | -0.02 | 0.987612309 |
| <i>Rhob</i>      | ras homolog family member B                                   | 0.38 | 0.00026164  | 0.12  | 0.888862375 | 0.33  | 0.432383301 |
| <i>Gpx1</i>      | glutathione peroxidase 1                                      | 0.40 | 0.000530864 | -0.17 | 0.895581497 | 0.22  | 0.384596127 |
| <i>Cst3</i>      | cystatin C                                                    | 0.40 | 0.007090904 | -0.27 | 0.782061505 | 0.26  | 0.143927941 |
| <i>Gpx4</i>      | glutathione peroxidase 4                                      | 0.43 | 0.000213441 | -0.39 | 0.675178332 | 0.20  | 0.478414195 |
| <i>Ncf1</i>      | neutrophil cytosolic factor 1                                 | 0.43 | 0.045720298 | 0.44  | 0.623446468 | -0.09 | 0.963832209 |
| <i>Cd36</i>      | CD36 molecule                                                 | 0.50 | 0.015376477 | -0.15 | 0.863170709 | 0.04  | 0.942798159 |
| <i>Atp7a</i>     | ATPase, Cu <sup>++</sup> transporting, alpha polypeptide      | 0.60 | 2.91E-08    | 0.47  | 0.425568609 | -0.07 | 0.897271195 |
| <i>Endog</i>     | endonuclease G                                                | 0.63 | 0.007719158 | -0.42 | 0.711220628 | 0.29  | 0.610280678 |
| <i>Rcan1</i>     | regulator of calcineurin 1                                    | 0.66 | 0.000450379 | -0.21 | 0.841521926 | 0.46  | 0.320131842 |
| <i>Plk3</i>      | polo like kinase 3                                            | 0.70 | 0.004929014 | 0.51  | 0.682362901 | 1.77  | 0.039700131 |
| <i>Ucp2</i>      | uncoupling protein 2 (mitochondrial, proton carrier)          | 0.70 | 1.13E-09    | 0.47  | 0.755982833 | 0.45  | 0.142809224 |
| <i>Net1</i>      | neuroepithelial cell transforming gene 1                      | 0.71 | 1.48E-07    | 0.54  | 0.62203586  | -0.10 | 0.849693178 |
| <i>Rom1</i>      | reactive oxygen species modulator 1                           | 0.93 | 1.31E-07    | -0.50 | 0.737405532 | 0.47  | 0.274058266 |
| <i>Klf2</i>      | Kruppel-like factor 2 (lung)                                  | 1.09 | 0.002295291 | 0.21  | 0.895369891 | 0.42  | 0.415412859 |
| <i>Trp53inp1</i> | transformation related protein 53 inducible nuclear protein 1 | 1.16 | 2.21E-20    | 0.71  | 0.154873494 | -0.02 | 0.979567587 |
| <i>Foxo3</i>     | forkhead box O3                                               | 1.23 | 1.85E-08    | 0.01  | 0.993251854 | 0.55  | 0.391127064 |
| <i>Ptgs2</i>     | prostaglandin-endoperoxide synthase 2                         | 1.26 | 0.000421116 | 0.86  | 0.70870442  | 0.90  | 0.661354847 |

**Table S4.** 50 most highly up regulated genes in brain after noise treatment (24h, 4d)

| <b>ID</b>         | <b>Description</b>                                      | <b>log2FC</b> |
|-------------------|---------------------------------------------------------|---------------|
| <i>Lrg1</i>       | leucine-rich alpha-2-glycoprotein 1                     | 1,50          |
| <i>Alas2</i>      | aminolevulinic acid synthase 2, erythroid               | 1,48          |
| <i>Hbb-b2</i>     | hemoglobin, beta adult minor chain                      | 1,37          |
| <i>Hbb-bs</i>     | hemoglobin, beta adult s chain                          | 1,15          |
| <i>Xlr3a</i>      | X-linked lymphocyte-regulated 3A                        | 0,95          |
| <i>Ctla2a</i>     | cytotoxic T lymphocyte-associated protein 2 alpha       | 0,83          |
| <i>Paqr5</i>      | progesterin and adipoQ receptor family member V         | 0,80          |
| <i>Edn1</i>       | endothelin 1                                            | 0,77          |
| <i>Ube2l6</i>     | ubiquitin-conjugating enzyme E2L 6                      | 0,76          |
| <i>AK131586</i>   | mitochondrially encoded cytochrome c oxidase II         | 0,76          |
| <i>Rps15a-ps6</i> | ribosomal protein S15A, pseudogene 6                    | 0,74          |
| <i>Cd14</i>       | CD14 antigen                                            | 0,73          |
| <i>AK131579</i>   | mitochondrially encoded cytochrome c oxidase III        | 0,72          |
| <i>BC069931</i>   | chr1:24,613,971-24,614,788 or chrM:7,790-8,607          | 0,72          |
| <i>Rpl31-ps12</i> | ribosomal protein L31, pseudogene 1 2                   | 0,72          |
| <i>AK018753</i>   | mitochondrially encoded NADH dehydrogenase 1            | 0,70          |
| <i>Mgp</i>        | matrix Gla protein                                      | 0,70          |
| <i>Gm694</i>      | steroid receptor associated and regulated protein       | 0,68          |
| <i>Sult1a1</i>    | sulfotransferase family 1A, phenol-preferring, member 1 | 0,68          |
| <i>Ly6a</i>       | lymphocyte antigen 6 complex, locus A                   | 0,67          |
| <i>AK163440</i>   | NADH-ubiquinone oxidoreductase chain 2 (EC 1.6.5.3)     | 0,67          |
| <i>DQ539915</i>   | Cytochrome oxidase subunit 1 (EC 1.9.3.1)               | 0,65          |
| <i>AU021092</i>   | expressed sequence AU021092                             | 0,64          |
| <i>Ly6c1</i>      | lymphocyte antigen 6 complex, locus C1                  | 0,64          |

|                               |                                                                 |      |
|-------------------------------|-----------------------------------------------------------------|------|
| <i>AK142750</i>               | mitochondrially encoded NADH dehydrogenase 4                    | 0,63 |
| <i>Eif4ebp1</i>               | eukaryotic translation initiation factor 4E binding protein 1   | 0,63 |
| <i>Vwf</i>                    | Von Willebrand factor                                           | 0,62 |
| <i>Rpl37</i>                  | ribosomal protein L37                                           | 0,61 |
| <i>Rps19</i>                  | ribosomal protein S19                                           | 0,61 |
| <i>Rps14</i>                  | ribosomal protein S14                                           | 0,60 |
| <i>Slc52a3</i>                | solute carrier protein family 52, member 3                      | 0,59 |
| <i>Tmem176a</i>               | transmembrane protein 176A                                      | 0,58 |
| <i>X57780</i>                 | mitochondrially encoded cytochrome b                            | 0,58 |
| <i>Rps23</i>                  | ribosomal protein S23                                           | 0,57 |
| <i>Rps28</i>                  | ribosomal protein S28                                           | 0,57 |
| <i>Rpl26,Gm15772</i>          | ribosomal protein L26                                           | 0,57 |
| <i>Rps12,Snora33,Snord100</i> | ribosomal protein S12                                           | 0,57 |
| <i>Rpl27</i>                  | ribosomal protein L27                                           | 0,56 |
| <i>Agt</i>                    | angiotensinogen (serpin peptidase inhibitor, clade A, member 8) | 0,56 |
| <i>Rpl30</i>                  | ribosomal protein L30                                           | 0,56 |
| <i>Fth1</i>                   | ferritin heavy polypeptide 1                                    | 0,55 |
| <i>Rpl35a</i>                 | ribosomal protein L35A                                          | 0,55 |
| <i>Rps21</i>                  | ribosomal protein S21                                           | 0,55 |
| <i>Rps20</i>                  | ribosomal protein S20                                           | 0,55 |
| <i>Fbln1,AK206280</i>         | fibulin 1                                                       | 0,55 |
| <i>Rps11</i>                  | ribosomal protein S11                                           | 0,54 |
| <i>Rpl34</i>                  | ribosomal protein L34                                           | 0,54 |
| <i>Rps4x</i>                  | ribosomal protein S4, X-linked                                  | 0,54 |
| <i>Rpl37a</i>                 | ribosomal protein L37a                                          | 0,53 |
| <i>Rps7</i>                   | ribosomal protein S7                                            | 0,53 |



**Table S5.** 50 most highly down regulated genes in brain after noise treatment (24h, 4d)

| <b>ID</b>                   | <b>Description</b>                                                        | <b>log2FC</b> |
|-----------------------------|---------------------------------------------------------------------------|---------------|
| <i>Sacs</i>                 | sacsin                                                                    | -1,42         |
| 4933409K07Rik <i>Gm3893</i> | RIKEN cDNA 4933409K07 gene                                                | -1,35         |
| <i>Dnah11</i>               | dynein, axonemal, heavy chain 11                                          | -1,12         |
| <i>Lingo4</i>               | leucine rich repeat and Ig domain containing 4                            | -1,10         |
| <i>Ankfn1</i>               | ankyrin-repeat and fibronectin type III domain containing 1               | -1,07         |
| <i>Gan</i>                  | giant axonal neuropathy                                                   | -1,07         |
| D830031N03Rik               | RIKEN cDNA D830031N03 gene                                                | -1,05         |
| <i>Glr1</i>                 | glycine receptor, alpha 1 subunit                                         | -1,04         |
| <i>Dgkh</i>                 | diacylglycerol kinase, eta                                                | -1,02         |
| <i>Tenm1</i>                | teneurin transmembrane protein 1                                          | -1,02         |
| <i>Hipk2</i>                | homeodomain interacting protein kinase 2                                  | -1,02         |
| <i>Gm340</i>                | predicted gene 340                                                        | -1,02         |
| <i>Dst</i>                  | dystonin                                                                  | -1,00         |
| <i>Rest</i>                 | RE1-silencing transcription factor                                        | -0,98         |
| <i>Gprin3</i>               | GPRIN family member 3                                                     | -0,98         |
| <i>Kcnh7</i>                | potassium voltage-gated channel, subfamily H (eag-related), member 7      | -0,95         |
| <i>Ago3</i>                 | argonaute RISC catalytic subunit 3                                        | -0,95         |
| <i>Spn</i>                  | spn family transcription repressor                                        | -0,93         |
| <i>Grin2a,AK086290</i>      | glutamate ionotropic receptor NMDA type subunit 2A                        | -0,93         |
| <i>Macf1</i>                | microtubule-actin crosslinking factor 1                                   | -0,90         |
| <i>Nbeal1,AK041465</i>      | neurobeachin like 1                                                       | -0,89         |
| <i>Fam135b</i>              | family with sequence similarity 135, member B                             | -0,89         |
| <i>Ksr2</i>                 | kinase suppressor of ras 2                                                | -0,88         |
| <i>AK171934,Aff2</i>        | AF4/FMR2 family member 2                                                  | -0,87         |
| <i>Mdn1</i>                 | midasin AAA ATPase 1                                                      | -0,86         |
| <i>Nkain3</i>               | Na <sup>+</sup> /K <sup>+</sup> transporting ATPase interacting 3         | -0,85         |
| <i>Slc6a5</i>               | solute carrier family 6 (neurotransmitter transporter, glycine), member 5 | -0,85         |

|                        |                                                                      |       |
|------------------------|----------------------------------------------------------------------|-------|
| <i>Tcp11l1</i>         | T-complex 11 Like 1                                                  | -0,84 |
| <i>Tmem178b</i>        | transmembrane protein 178B                                           | -0,83 |
| <i>Arfgef3</i>         | ARFGEF family member 3                                               | -0,83 |
| <i>Hivep3,Krc</i>      | human immunodeficiency virus type I enhancer binding protein 3       | -0,83 |
| <i>Zfp369</i>          | zinc finger protein 369                                              | -0,82 |
| <i>D630041G03Rik</i>   | RIKEN cDNA D630041G03 gene                                           | -0,80 |
| <i>Unc80</i>           | unc-80, NALCN activator                                              | -0,79 |
| <i>Tnr</i>             | tenascin R                                                           | -0,79 |
| <i>Trip11,AK045549</i> | thyroid hormone receptor interactor 11                               | -0,78 |
| <i>Xkr4,AK135172</i>   | XK related 4                                                         | -0,77 |
| <i>Sv2c</i>            | synaptic vesicle glycoprotein 2c                                     | -0,77 |
| <i>AB352175</i>        | chr9:27,351,045-27,351,072                                           | -0,76 |
| <i>Ptar1</i>           | protein prenyltransferase alpha subunit repeat containing 1          | -0,75 |
| <i>Dok6</i>            | docking protein 6                                                    | -0,74 |
| <i>Cep350</i>          | centrosomal protein 350                                              | -0,74 |
| <i>F5</i>              | coagulation factor V                                                 | -0,74 |
| <i>AK039686</i>        | predicted gene 10010                                                 | -0,73 |
| <i>Tenm4</i>           | teneurin transmembrane protein 4                                     | -0,72 |
| <i>Lyst</i>            | lysosomal trafficking regulator                                      | -0,71 |
| <i>Kcnq3</i>           | potassium voltage-gated channel, subfamily Q, member 3               | -0,70 |
| <i>AK164996,Trpm3</i>  | transient receptor potential cation channel subfamily M member 3     | -0,69 |
| <i>Plcx3</i>           | phosphatidylinositol-specific phospholipase C, X domain containing 3 | -0,69 |
| <i>Cbl</i>             | Casitas B-lineage lymphoma                                           | -0,69 |

**Table S6.** 50 most highly up regulated genes after noise treatment during the sleep phase (12h, 4d)

| <b>ID</b>            | <b>Description</b>                                                                             | <b>log2FC</b> |
|----------------------|------------------------------------------------------------------------------------------------|---------------|
| <i>Atoh8</i>         | atonal bHLH transcription factor 8                                                             | 0.93          |
| <i>Zfp703</i>        | zinc finger protein 703                                                                        | 0.87          |
| <i>Tmem229b</i>      | transmembrane protein 229B                                                                     | 0.73          |
| <i>Map3k6</i>        | mitogen-activated protein kinase kinase kinase 6                                               | 0.87          |
| <i>Ihh</i>           | Indian hedgehog                                                                                | 0.90          |
| <i>Dgkg</i>          | diacylglycerol kinase, gamma                                                                   | 0.86          |
| <i>Bmf</i>           | BCL2 modifying factor                                                                          | 0.97          |
| <i>Eef2k</i>         | eukaryotic elongation factor-2 kinase                                                          | 0.66          |
| <i>Fkbp5</i>         | FK506 binding protein 5                                                                        | 1.31          |
| <i>Pip5k1b</i>       | phosphatidylinositol-4-phosphate 5-kinase, type 1 beta                                         | 0.83          |
| <i>Id2</i>           | inhibitor of DNA binding 2                                                                     | 0.73          |
| <i>Snai2</i>         | snail family zinc finger 2                                                                     | 0.71          |
| <i>2010300C02Rik</i> | RIKEN cDNA 2010300C02 gene                                                                     | 0.73          |
| <i>Lpin3</i>         | lipin 3                                                                                        | 0.62          |
| <i>Fam212b</i>       | family with sequence similarity 212, member B                                                  | 0.64          |
| <i>Dock5</i>         | dedicator of cytokinesis 5                                                                     | 0.64          |
| <i>Irf2bpl</i>       | interferon regulatory factor 2 binding protein-like                                            | 0.61          |
| <i>5930403L14Rik</i> | RIKEN cDNA 5930403L14 gene                                                                     | 0.54          |
| <i>Fbxo31</i>        | F-box protein 31                                                                               | 0.58          |
| <i>Socs1</i>         | suppressor of cytokine signaling 1                                                             | 0.83          |
| <i>AK047676</i>      | RIKEN cDNA C030009J22 gene                                                                     | 1.42          |
| <i>Mt1</i>           | metallothionein 1                                                                              | 0.62          |
| <i>Hey1</i>          | hairy/enhancer-of-split related with YRPW motif 1                                              | 0.72          |
| <i>Mn1</i>           | meningioma 1                                                                                   | 0.69          |
| <i>Mthfd2</i>        | methylenetetrahydrofolate dehydrogenase (NAD <sup>+</sup> dependent), methenyltetrahydrofolate | 0.62          |
| <i>Mob2</i>          | MOB kinase activator 2                                                                         | 0.51          |

|                      |                                                                              |      |
|----------------------|------------------------------------------------------------------------------|------|
| <i>Hoxb6</i>         | homeobox B6                                                                  | 0.62 |
| <i>Zfp775</i>        | zinc finger protein 775                                                      | 0.58 |
| <i>Fmo3</i>          | flavin containing monooxygenase 3                                            | 0.61 |
| <i>Mitf</i>          | microphthalmia-associated transcription factor                               | 0.53 |
| <i>Ankrd34a</i>      | ankyrin repeat domain 34A                                                    | 0.80 |
| <i>Fam160a1</i>      | family with sequence similarity 160, member A1                               | 0.51 |
| <i>Sema4c</i>        | sema domain, immunoglobulin domain (Ig), transmembrane domain (TM) and short | 0.48 |
| <i>Snta1</i>         | ylntrophin, acidic 1                                                         | 0.46 |
| <i>Cxxc5</i>         | CXXC finger 5                                                                | 0.57 |
| <i>AK171391</i>      | chemokine (C-C motif) receptor 5                                             | 0.63 |
| <i>Irx3</i>          | Iroquois related homeobox 3                                                  | 0.71 |
| <i>Foxs1</i>         | forkhead box S1                                                              | 0.62 |
| <i>Cyb561</i>        | cytochrome b-561                                                             | 0.48 |
| <i>Tet1</i>          | tet methylcytosine dioxygenase 1                                             | 0.66 |
| <i>Hr</i>            | hairless                                                                     | 0.49 |
| <i>Ahdc1</i>         | AT hook, DNA binding motif, containing 1                                     | 0.46 |
| <i>Ypel2</i>         | yippee-like 2 (Drosophila)                                                   | 0.50 |
| <i>Srl</i>           | sarcalumenin                                                                 | 0.47 |
| <i>Nkx3-1</i>        | NK-3 transcription factor, locus 1 (Drosophila)                              | 1.45 |
| <i>AK134859</i>      | chr2:131281304-131281363                                                     | 0.85 |
| <i>D930015E06Rik</i> | transmembrane 131 like                                                       | 0.52 |
| <i>AI414108</i>      | immunoglobulin superfamily, member 9B                                        | 0.43 |
| <i>Ccdc141</i>       | coiled-coil domain containing 141                                            | 0.50 |
| <i>Hoxb5</i>         | homeobox B5                                                                  | 0.50 |

**Table S7.** 50 most highly down regulated genes after noise treatment during the sleep phase (12h, 4d)

| <b>ID</b>       | <b>Description</b>                                                                            | <b>log2FC</b> |
|-----------------|-----------------------------------------------------------------------------------------------|---------------|
| <i>Hspa1a</i>   | heat shock protein 1A                                                                         | -3.27         |
| <i>Serpine1</i> | serine (or cysteine) peptidase inhibitor, clade E, member 1                                   | -1.88         |
| <i>Ptgs2</i>    | prostaglandin-endoperoxide synthase 2                                                         | -1.79         |
| <i>Dnajb4</i>   | DnaJ heat shock protein family (Hsp40) member B4                                              | -1.70         |
| <i>Nfil3</i>    | nuclear factor, interleukin 3, regulated                                                      | -1.64         |
| <i>Abra</i>     | actin-binding Rho activating protein                                                          | -1.55         |
| <i>Irs2</i>     | insulin receptor substrate 2                                                                  | -1.48         |
| <i>Arid5a</i>   | AT rich interactive domain 5A (MRF1-like)                                                     | -1.47         |
| <i>Per1</i>     | period circadian clock 1                                                                      | -1.42         |
| <i>Errfi1</i>   | ERBB receptor feedback inhibitor 1                                                            | -1.41         |
| <i>Adamts1</i>  | a disintegrin-like and metallopeptidase (reprolysin type) with thrombospondin type 1 motif, 1 | -1.38         |
| <i>Stil</i>     | Sc1/Tal1 interrupting locus                                                                   | -1.38         |
| <i>Cd83</i>     | CD83 antigen                                                                                  | -1.33         |
| <i>Nr4a3</i>    | nuclear receptor subfamily 4, group A, member 3                                               | -1.33         |
| <i>Sgk1</i>     | serum/glucocorticoid regulated kinase 1                                                       | -1.26         |
| <i>Dnajb1</i>   | DnaJ heat shock protein family (Hsp40) member B1                                              | -1.20         |
| <i>Cited2</i>   | Cbp/p300-interacting transactivator, with Glu/Asp-rich carboxy-terminal domain, 2             | -1.19         |
| <i>Csrnp1</i>   | cysteine-serine-rich nuclear protein 1                                                        | -1.16         |
| <i>Ctgf</i>     | connective tissue growth factor                                                               | -1.14         |
| <i>Otud1</i>    | OTU domain containing 1                                                                       | -1.13         |
| <i>Gem</i>      | GTP binding protein (gene overexpressed in skeletal muscle)                                   | -1.06         |
| <i>Net1</i>     | neuroepithelial cell transforming gene 1                                                      | -1.00         |
| <i>Bdnf</i>     | brain derived neurotrophic factor                                                             | -0.98         |
| <i>Klf2</i>     | Kruppel-like factor 2 (lung)                                                                  | -0.95         |
| <i>Rsrp1</i>    | arginine/serine rich protein 1                                                                | -0.95         |
| <i>Cdkn2b</i>   | cyclin-dependent kinase inhibitor 2B (p15, inhibits CDK4)                                     | -0.94         |
| <i>Fosl2</i>    | fos-like antigen 2                                                                            | -0.93         |

|                 |                                                                                       |       |
|-----------------|---------------------------------------------------------------------------------------|-------|
| <i>Gm5148</i>   | predicted gene 5148                                                                   | -0.90 |
| <i>Rcan1</i>    | regulator of calcineurin 1                                                            | -0.89 |
| <i>AK044623</i> | chr15:81855734-81858323                                                               | -0.87 |
| <i>Hspa1l</i>   | heat shock protein 1-like                                                             | -0.82 |
| <i>Amotl2</i>   | angiomin-like 2                                                                       | -0.81 |
| <i>Siah2</i>    | seven in absentia 2                                                                   | -0.80 |
| <i>Filip1l</i>  | filamin A interacting protein 1-like                                                  | -0.79 |
| <i>Dusp8</i>    | dual specificity phosphatase 8                                                        | -0.79 |
| <i>Neurl3</i>   | neuralized E3 ubiquitin protein ligase 3                                              | -0.78 |
| <i>Xirp1</i>    | xin actin-binding repeat containing 1                                                 | -0.76 |
| <i>Trib1</i>    | tribbles pseudokinase 1                                                               | -0.73 |
| <i>Rasl11b</i>  | RAS-like, family 11, member B                                                         | -0.73 |
| <i>Usp42</i>    | ubiquitin specific peptidase 42                                                       | -0.69 |
| <i>Cebpd</i>    | CCAAT/enhancer binding protein (C/EBP), delta                                         | -0.68 |
| <i>Ier3</i>     | immediate early response 3                                                            | -0.68 |
| <i>Nedd9</i>    | neural precursor cell expressed, developmentally down-regulated gene 9                | -0.68 |
| <i>Tsc22d3</i>  | TSC22 domain family, member 3                                                         | -0.65 |
| <i>Arid5b</i>   | AT rich interactive domain 5B (MRF1-like)                                             | -0.61 |
| <i>Lbh</i>      | limb-bud and heart                                                                    | -0.61 |
| <i>AK170928</i> | zinc finger and BTB domain containing 21                                              | -0.60 |
| <i>Bmp2</i>     | bone morphogenetic protein 2                                                          | -0.60 |
| <i>Nfkbia</i>   | nuclear factor of kappa light polypeptide gene enhancer in B cells inhibitor, alpha   | -0.57 |
| <i>Dcun1d3</i>  | DCN1, defective in cullin neddylation 1, domain containing 3 ( <i>S. cerevisiae</i> ) | -0.54 |

**Table S8.** 50 most highly up regulated genes after noise treatment during the awake phase (12h, 4d)

| <b>ID</b>         | <b>Description</b>                                                                             | <b>log2FC</b> |
|-------------------|------------------------------------------------------------------------------------------------|---------------|
| <i>Has3</i>       | hyaluronan synthase 3                                                                          | 0.89          |
| <i>AK202495</i>   | chr2:151459638-151460046                                                                       | 0.70          |
| <i>Dgkg</i>       | diacylglycerol kinase, gamma                                                                   | 0.69          |
| <i>Npy1r</i>      | neuropeptide Y receptor Y1                                                                     | 0.67          |
| <i>Eva1c</i>      | eva-1 homolog C (C. elegans)                                                                   | 0.71          |
| <i>Spsb1</i>      | splA/ryanodine receptor domain and SOCS box containing 1                                       | 0.59          |
| <i>Slc38a11</i>   | solute carrier family 38, member 11                                                            | 0.56          |
| <i>Klf15</i>      | Kruppel-like factor 15                                                                         | 0.69          |
| <i>Hectd2</i>     | HECT domain E3 ubiquitin protein ligase 2                                                      | 0.65          |
| <i>Adamts15</i>   | a disintegrin-like and metallopeptidase (reprolysin type) with thrombospondin type 1 motif, 15 | 0.50          |
| <i>Klf9</i>       | Kruppel-like factor 9                                                                          | 0.52          |
| <i>Sema3a</i>     | sema domain, immunoglobulin domain (Ig), short basic domain, secreted, (semaphorin) 3A         | 0.49          |
| <i>Atoh8</i>      | atonal bHLH transcription factor 8                                                             | 0.55          |
| <i>Phtf2</i>      | putative homeodomain transcription factor 2                                                    | 0.45          |
| <i>Vcan</i>       | versican                                                                                       | 0.47          |
| <i>Tmem229b</i>   | transmembrane protein 229B                                                                     | 0.60          |
| <i>Slc25a33</i>   | solute carrier family 25, member 33                                                            | 0.57          |
| <i>Htr1b</i>      | 5-hydroxytryptamine (serotonin) receptor 1B                                                    | 0.52          |
| <i>Csgalnact1</i> | chondroitin sulfate N-acetylgalactosaminyltransferase 1                                        | 0.45          |
| <i>A4galt</i>     | alpha 1,4-galactosyltransferase                                                                | 0.45          |
| <i>Slc45a3</i>    | solute carrier family 45, member 3                                                             | 0.55          |
| <i>Fibin</i>      | fin bud initiation factor homolog (zebrafish)                                                  | 0.48          |
| <i>Slc4a7</i>     | solute carrier family 4, sodium bicarbonate cotransporter, member 7                            | 0.46          |
| <i>Glt28d2</i>    | glycosyltransferase 28 domain containing 2                                                     | 0.50          |
| <i>Chst3</i>      | carbohydrate (chondroitin 6/keratan) sulfotransferase 3                                        | 0.43          |
| <i>Lgalsl</i>     | lectin, galactoside binding-like                                                               | 0.39          |
| <i>Tfrc</i>       | transferrin receptor                                                                           | 0.45          |

|                      |                                                                                    |      |
|----------------------|------------------------------------------------------------------------------------|------|
| <i>Bdh1</i>          | 3-hydroxybutyrate dehydrogenase, type 1                                            | 0.44 |
| <i>Ppp1r12b</i>      | protein phosphatase 1, regulatory (inhibitor) subunit 12B                          | 0.37 |
| <i>Fbxo40</i>        | F-box protein 40                                                                   | 0.47 |
| <i>4930523C07Rik</i> | RIKEN cDNA 4930523C07 gene                                                         | 0.40 |
| <i>Sacs</i>          | sacsin                                                                             | 0.43 |
| <i>AK158301</i>      | RAN binding protein 2                                                              | 0.39 |
| <i>Tll7</i>          | tubulin tyrosine ligase-like family, member 7                                      | 0.38 |
| <i>Synpo2l</i>       | synaptopodin 2-like                                                                | 0.44 |
| <i>Rgs7bp</i>        | regulator of G-protein signalling 7 binding protein                                | 0.42 |
| <i>Ppp1r14c</i>      | protein phosphatase 1, regulatory (inhibitor) subunit 14c                          | 0.44 |
| <i>Akap6</i>         | A kinase (PRKA) anchor protein 6                                                   | 0.42 |
| <i>Kcnma1</i>        | potassium large conductance calcium-activated channel, subfamily M, alpha member 1 | 0.38 |
| <i>Prkaa2</i>        | protein kinase, AMP-activated, alpha 2 catalytic subunit                           | 0.37 |
| <i>Rock1</i>         | Rho-associated coiled-coil containing protein kinase 1                             | 0.42 |
| <i>Gipc2</i>         | GIPC PDZ domain containing family, member 2                                        | 0.42 |
| <i>Gpr21</i>         | G protein-coupled receptor 21                                                      | 0.48 |
| <i>AK034707</i>      | chr3:142244461-142246549                                                           | 0.38 |
| <i>9330182L06Rik</i> | RIKEN cDNA 9330182L06 gene                                                         | 0.45 |
| <i>Lancl3</i>        | LanC lantibiotic synthetase component C-like 3 (bacterial)                         | 0.40 |
| <i>Ccdc141</i>       | coiled-coil domain containing 141                                                  | 0.42 |
| <i>AK084689</i>      | cyclin-dependent kinase-like 5                                                     | 0.41 |
| <i>Slmap</i>         | sarcolemma associated protein                                                      | 0.35 |
| <i>Edem3</i>         | ER degradation enhancer, mannosidase alpha-like 3                                  | 0.34 |



**Table S9.** 50 most highly down regulated genes after noise treatment during the awake phase (12h, 4d)

| <b>ID</b>      | <b>Description</b>                                                    | <b>log2FC</b> |
|----------------|-----------------------------------------------------------------------|---------------|
| <i>Pck1</i>    | phosphoenolpyruvate carboxykinase 1, cytosolic                        | -1.91         |
| <i>Acsm3</i>   | acyl-CoA synthetase medium-chain family member 3                      | -1.52         |
| <i>Hp</i>      | haptoglobin                                                           | -1.47         |
| <i>Adig</i>    | adipogenin                                                            | -1.28         |
| <i>Klhdc7a</i> | kelch domain containing 7A                                            | -1.27         |
| <i>Ankef1</i>  | ankyrin repeat and EF-hand domain containing 1                        | -1.05         |
| <i>Mpz</i>     | myelin protein zero                                                   | -1.05         |
| <i>Gm5148</i>  | predicted gene 5148                                                   | -0.91         |
| <i>Arid5a</i>  | AT rich interactive domain 5A (MRF1-like)                             | -0.90         |
| <i>Cd83</i>    | CD83 antigen                                                          | -0.85         |
| <i>Dusp10</i>  | dual specificity phosphatase 10                                       | -0.81         |
| <i>Dnajb1</i>  | DnaJ heat shock protein family (Hsp40) member B1                      | -0.77         |
| <i>Tnnt2</i>   | troponin T2, cardiac                                                  | -0.76         |
| <i>Ppara</i>   | peroxisome proliferator activated receptor alpha                      | -0.74         |
| <i>Bcl6</i>    | B cell leukemia/lymphoma 6                                            | -0.73         |
| <i>Bcl3</i>    | B cell leukemia/lymphoma 3                                            | -0.72         |
| <i>G0s2</i>    | G0/G1 switch gene 2                                                   | -0.68         |
| <i>Slc16a1</i> | solute carrier family 16 (monocarboxylic acid transporters), member 1 | -0.67         |
| <i>Pla2g16</i> | phospholipase A2, group XVI                                           | -0.64         |
| <i>Dynlt1f</i> | dynein light chain Tctex-type 1F                                      | -0.63         |
| <i>Sowahc</i>  | soondowah ankyrin repeat domain family member C                       | -0.63         |
| <i>Bambi</i>   | BMP and activin membrane-bound inhibitor                              | -0.62         |
| <i>Angptl4</i> | angiopoietin-like 4                                                   | -0.62         |
| <i>Pnpla2</i>  | patatin-like phospholipase domain containing 2                        | -0.61         |
| <i>Bcl6b</i>   | B cell CLL/lymphoma 6, member B                                       | -0.59         |
| <i>Tnfsf10</i> | tumor necrosis factor (ligand) superfamily, member 10                 | -0.59         |
| <i>Tst</i>     | thiosulfate sulfurtransferase, mitochondrial                          | -0.59         |

|                      |                                                                                          |       |
|----------------------|------------------------------------------------------------------------------------------|-------|
| <i>Abra</i>          | actin-binding Rho activating protein                                                     | -0.57 |
| <i>Cdkn2c</i>        | cyclin-dependent kinase inhibitor 2C (p18, inhibits CDK4)                                | -0.57 |
| <i>Klf2</i>          | Kruppel-like factor 2 (lung)                                                             | -0.57 |
| <i>Epha2</i>         | Eph receptor A2                                                                          | -0.55 |
| <i>Arhgef15</i>      | Rho guanine nucleotide exchange factor (GEF) 15                                          | -0.55 |
| <i>Acaa2</i>         | acetyl-Coenzyme A acyltransferase 2 (mitochondrial 3-oxoacyl-Coenzyme A thiolase)        | -0.55 |
| <i>Fam195a</i>       | Mcrip2 - MAPK Regulated Corepressor Interacting Protein 2                                | -0.55 |
| <i>ApoE</i>          | apolipoprotein E                                                                         | -0.54 |
| <i>Adora1</i>        | adenosine A1 receptor                                                                    | -0.53 |
| <i>Rcan1</i>         | regulator of calcineurin 1                                                               | -0.53 |
| <i>Siah2</i>         | seven in absentia 2                                                                      | -0.51 |
| <i>AB347309</i>      | chr4:103563814-103564162                                                                 | -0.51 |
| <i>AK140265</i>      | mitochondrially encoded 12S rRNA                                                         | -0.51 |
| <i>Spry2</i>         | sprouty homolog 2 (Drosophila)                                                           | -0.51 |
| <i>Psmb8</i>         | proteasome (prosome, macropain) subunit, beta type 8 (large multifunctional peptidase 7) | -0.49 |
| <i>Lmo2</i>          | LIM domain only 2                                                                        | -0.49 |
| <i>Clk1</i>          | CDC-like kinase 1                                                                        | -0.48 |
| <i>Vamp5</i>         | vesicle-associated membrane protein 5                                                    | -0.48 |
| <i>Etfb</i>          | electron transferring flavoprotein, beta polypeptide                                     | -0.48 |
| <i>C130074G19Rik</i> | RIKEN cDNA C130074G19 gene                                                               | -0.46 |
| <i>Trib1</i>         | tribbles pseudokinase 1                                                                  | -0.45 |
| <i>Adh1</i>          | alcohol dehydrogenase 1 (class I)                                                        | -0.41 |
| <i>Fam43a</i>        | family with sequence similarity 43, member A                                             | -0.41 |
